# Supplementary material for: Protective effects of intrathecal injection of AAV9-RabGGTB-GFP+ in SOD1G93A mice
Source: Frontiers journal article supplement (doi:10.3389/fnagi.2023.1092607), 2023-03-10
Supplement: Data_Sheet_4.ZIP [file Data_Sheet_4.ZIP]

## Sheet: Sheet1
WT					Control				Untreat					Treat
Age in days	NO.	Weight			Age in days	NO.	Weight		Age in days	NO.	Weight
80	1	20.34			80	1	22.22		80	1	22.36			1	23.87
	2	20.88				2	23.56			2	22.57			2	22.17
	3	21.34				3	20.98			3	21.09			3	21.78
	4	23.45				4	23.76			4	23.56			4	22.87
	5	21.09				5	22.43			5	22.45			5	22.12
	6	23.44				6	20.56			6	20.48			6	22.36
	7	22.22				7	21.89			7	22.09			7	23.67
	8	20.87				8	21.89			8	21.09			8	24.17
	9	21.22				9	22.76			9	22.08			9	22.13
	10	23.22				10	23.77			10	23.78			10	18.98
	11	22.98				11	20.21			11	19.88			11	19.34
	12	20.34				12	19.68			12	20.06			12	20.27
	13	20.81				13	21.87			13	21.56			13	21.45
	14	21.25				14	20.67			14	20.99			14	22.09
	15	19.87				15	21.66			15	21.09			15	21.25
	16	21.09				16	21.89
	Mean	21.53				Mean	21.86			Mean	21.68			Mean	21.9
	SEM	0.2911				SEM	0.3083			SEM	0.3005			SEM	0.3898
84	1	20.55			84	1	21.56			1	22.16			1	24.08
	2	20.88				2	23.58			2	22.37			2	22.18
	3	21.54				3	21.22			3	21			3	22.97
	4	23.98				4	23.98			4	23.06			4	22.16
	5	21.09				5	22.56			5	22.05			5	22.56
	6	23.54				6	21.02			6	20.57			6	22.78
	7	22.62				7	22.03			7	21.98			7	23.17
	8	21.37				8	21.05			8	22.08			8	24.76
	9	21.22				9	21.88			9	22.08			9	22.69
	10	23.22				10	23.88			10	23.55			10	19.57
	11	22.98				11	20.08			11	20.04			11	19.97
	12	20.54				12	20.66			12	20.06			12	19.98
	13	20.81				13	21.09			13	21.05			13	21.98
	14	21.65				14	20.66			14	20.03			14	22.66
	15	19.97				15	21.88			15	20.56			15	21.35
	16	21.09				16	21.64
	Mean	21.69				Mean	21.8			Mean	21.51			Mean	22.19
	SEM	0.3001				SEM	0.2926			SEM	0.2895			SEM	0.3788
87	1	20.55			87	1	21.06			1	21.05			1	24.08
	2	20.88				2	23.48			2	21.97			2	22.58
	3	21.84				3	21.02			3	20.66			3	22.97
	4	23.98				4	23.78			4	22.34			4	22.16
	5	21.09				5	22.36			5	21.35			5	22.56
	6	23.94				6	21.56			6	20.07			6	22.08
	7	22.62				7	22.53			7	21.44			7	22.17
	8	21.37				8	20.08			8	22.22			8	24.76
	9	21.72				9	21.22			9	22.45			9	22.69
	10	23.22				10	23.09			10	22.88			10	19.57
	11	23.28				11	19.23			11	19.56			11	19.57
	12	20.54				12	20.76			12	19.37			12	19.38
	13	21.91				13	20.97			13	20.45			13	21.98
	14	21.65				14	20.08			14	19.43			14	22.76
	15	19.97				15	21.76			15	20.05			15	21.35
	16	21.09				16	20.98
	Mean	21.85				Mean	21.5			Mean	21.02			Mean	22.04
	SEM	0.3079				SEM	0.3182			SEM	0.3052			SEM	0.4007
90	1	21.55			90	1	20.96			1	20.89			1	24.1
	2	20.88				2	23.05			2	21.43			2	22.48
	3	21.84				3	20.93			3	20.16			3	22.97
	4	22.98				4	23.79			4	21.87			4	22.16
	5	21.09				5	22.02			5	21			5	22.56
	6	23.94				6	21.45			6	19.56			6	22.08
	7	22.62				7	22.54			7	21.08			7	21.98
	8	21.97				8	19.87			8	22.35			8	24.21
	9	21.72				9	20.22			9	22.02			9	22.69
	10	23.22				10	22.96			10	22.39			10	19.57
	11	23.58				11	18.88			11	19.04			11	18.98
	12	20.54				12	20.33			12	18.84			12	19.38
	13	22.88				13	19.89			13	19.87			13	22.01
	14	21.65				14	19.76			14	19.05			14	22.76
	15	20.07				15	21.08			15	19.67			15	21.15
	16	21.29				16	20.05
	Mean	21.99				Mean	21.11			Mean	20.61			Mean	21.94
	SEM	0.2794				SEM	0.3521			SEM	0.3212			SEM	0.4049
94	1	21.66			94	1	20.08			1	20.09			1	24.15
	2	20.88				2	22.56			2	21.03			2	22.51
	3	21.94				3	20.18			3	19.76			3	23.09
	4	22.98				4	23.89			4	21.27			4	22.16
	5	21.09				5	21.87			5	20.45			5	22.56
	6	23.94				6	21.08			6	19.06			6	22.24
	7	22.62				7	22.51			7	19.36			7	20.11
	8	22.37				8	18.89			8	21.88			8	23.34
	9	21.72				9	19.78			9	21.35			9	22.69
	10	23.22				10	21.66			10	21.78			10	18.87
	11	23.58				11	18.25			11	18.55			11	18.42
	12	20.64				12	19.97			12	18.37			12	19.38
	13	22.88				13	19.08			13	19.21			13	21.45
	14	21.65				14	18.96			14	18.66			14	23.01
	15	20.07				15	20.22			15	19.02			15	21.15
	16	21.29				16	19.24
	Mean	22.03				Mean	20.51			Mean	19.99			Mean	21.68
	SEM	0.2774				SEM	0.3985			SEM	0.3155			SEM	0.4486
97	1	21.86			97	1	20.08			1	19.92			1	23.98
	2	20.88				2	22.56			2	20.38			2	22.66
	3	21.94				3	20.18			3	19.35			3	22.65
	4	22.98				4	23.89			4	20.78			4	21.98
	5	21.59				5	21.87			5	19.88			5	21.54
	6	23.94				6	21.08			6	18.25			6	21.38
	7	22.82				7	22.51			7	18.41			7	20.45
	8	22.37				8	18.89			8	21.02			8	23.04
	9	21.72				9	19.78			9	20.66			9	22.13
	10	23.42				10	21.66			10	20.15			10	18.45
	11	23.58				11	18.25			11	18.22			11	18.11
	12	20.64				12	19.97			12	18.11			12	18.57
	13	22.88				13	19.08			13	18.76			13	20.97
	14	21.85				14	18.96			14	18.12			14	23.35
	15	20.07				15	20.22			15	18.34			15	20.95
	16	21.29				16	19.24
	Mean	22.11				Mean	19.81			Mean	19.36			Mean	21.35
	SEM	0.2757				SEM	0.3845			SEM	0.2815			SEM	0.4679
100	1	21.86			100	1	18.75		124	1	19.18			1	23.47
	2	21.28				2	20.98		120	2	19.85			2	22.03
	3	21.94				3	19.34		124	3	18.73			3	21.15
	4	22.98				4	21.88		120	4	20.23			4	21.09
	5	21.79				5	20.98		120	5	19.21			5	21.04
	6	23.94				6	19.87		127	6	19.76			6	21.67
	7	22.92				7	20.88		127	7	17.34			7	21.15
	8	22.37				8	17.76		130	8	20.35			8	23.17
	9	21.72				9	18.23		130	9	20.43			9	22.75
	10	23.42				10	20.66		124	10	19.47			10	17.76
	11	23.68				11	16.89		124	11	19.37			11	17.85
	12	20.64				12	18.56		117	12	17.35			12	17.93
	13	22.88				13	17.98		117	13	17.87			13	20.08
	14	21.95				14	17.78		124	14	17.49			14	22.76
	15	20.07				15	19.22		124	15	17.56			15	20.42
	16	21.29				16	18.23
	Mean	22.17				Mean	19.25			Mean	18.95			Mean	20.95
	SEM	0.2708				SEM	0.3669			SEM	0.2948			SEM	0.4857
104	1	21.86			104	1	18.43			1	18.45			1	22.95
	2	21.58				2	20.36			2	19.22			2	21.95
	3	22.64				3	18.88			3	18.24			3	20.56
	4	22.98				4	20.69			4	19.67			4	20.78
	5	21.79				5	20.34			5	18.59			5	21.06
	6	23.94				6	19.35			6	19.26			6	21.66
	7	23.92				7	20.25			7	16.66			7	20.88
	8	22.37				8	17.24			8	19.89			8	22.57
	9	21.72				9	17.89			9	19.92			9	22.75
	10	23.42				10	20.16			10	18.27			10	17.36
	11	23.68				11	16.16			11	18.68			11	16.83
	12	21.64				12	18.11			12	18.67			12	17.23
	13	22.88				13	17.35			13	16.98			13	19.45
	14	21.95				14	17.09			14	16.89			14	22.38
	15	20.67				15	18.64			15	17.08			15	19.92
	16	21.29				16	18.09
	Mean	22.4				Mean	18.69			Mean	18.43			Mean	20.56
	SEM	0.2482				SEM	0.3467			SEM	0.2832			SEM	0.5268
107	1	21.96			107	1	17.89			1	17.98		108	1	22.34
	2	21.58				2	20.01			2	18.78		110	2	21.04
	3	22.64				3	18.24			3	17.55		106	3	20.11
	4	23.08				4	20.09			4	19.06		96	4	19.25
	5	21.79				5	19.87			5	18.08		111	5	20.98
	6	23.94				6	18.76			6	18.44		114	6	20.87
	7	23.92				7	19.89			7	16.88		97	7	20.12
	8	22.37				8	16.67			8	19.37		105	8	22.11
	9	21.72				9	17.22			9	19.27		106	9	22.03
	10	23.42				10	19.15			10	19.56		98	10	17.02
	11	23.68				11	16.09			11	18.26		92	11	16.06
	12	21.64				12	17.23			12	18.13		94	12	16.66
	13	22.88				13	16.78			13	16.66		106	13	18.46
	14	22.15				14	16.45			14	16.11		111	14	21.88
	15	20.87				15	17.98			15	16.67		104	15	19.92
	16	21.29				16	17.89
	Mean	22.43				Mean	18.14			Mean	18.05			Mean	19.92
	SEM	0.2416				SEM	0.3395			SEM	0.2802			SEM	0.5292
110	1	22.36			110	1	16.88			1	17.49			1	21.66
	2	21.58				2	19.25			2	18.04			2	20.76
	3	22.64				3	17.88			3	17.11			3	20.04
	4	23.08				4	19.49			4	18.34			4	18.77
	5	21.89				5	19.13			5	17.52			5	20.15
	6	23.94				6	18.23			6	17.87			6	20.24
	7	23.92				7	19.14			7	16.54			7	19.36
	8	22.37				8	16.67			8	19.52			8	21.66
	9	21.82				9	16.89			9	19.66			9	21.65
	10	23.42				10	18.78			10	18.89			10	16.56
	11	23.98				11	16.09			11	17.92			11	16.06
	12	21.64				12	16.33			12	17.23			12	16.76
	13	22.88				13	16.78			13	15.54			13	18.06
	14	22.45				14	15.21			14	15.98			14	21.09
	15	20.87				15	17.13			15	16.21			15	19.78
	16	21.29				16	16.98
	Mean	22.51				Mean	17.55			Mean	17.59			Mean	19.51
	SEM	0.2433				SEM	0.3267			SEM	0.3149			SEM	0.488
114	1	22.36			114	1	15.45			1	17.02			1	21.03
	2	21.58				2	19.03			2	17.16			2	20.22
	3	22.84				3	17.46			3	16.45			3	19.87
	4	23.08				4	19.03			4	17.19			4	18.39
	5	21.99				5	18.66			5	17.11			5	20.01
	6	23.94				6	17.96			6	17.02			6	20.24
	7	23.92				7	18.35			7	16.23			7	19.36
	8	22.37				8	16.67			8	18.82			8	21.66
	9	21.82				9	16.66			9	19.03			9	21.65
	10	23.69				10	18.09			10	18.15			10	16.56
	11	23.98				11	16.09			11	16.66			11	16.06
	12	21.97				12	16.33			12	16.62			12	16.76
	13	22.88				13	16.25			13	14.76			13	18.06
	14	22.55				14	15.21			14	16.04			14	21.09
	15	20.98				15	16.78			15	16.62			15	19.27
	16	21.29				16	16.09
	Mean	22.55				Mean	17.13			Mean	16.99			Mean	19.35
	SEM	0.2533				SEM	0.3123			SEM	0.2766			SEM	0.4713
117	1	22.36			117	1	14.87			1	16.88			1	20.76
	2	22.58				2	18.64			2	16.54			2	20.33
	3	22.84				3	17.26			3	16.19			3	19.34
	4	23.08				4	18.87			4	16.67			4	18.11
	5	21.99				5	18.35			5	16.21			5	20.01
	6	24.54				6	17.78			6	16.78			6	20.24
	7	23.92				7	18.03			7	15.98			7	19.36
	8	22.37				8	16.67			8	17.98			8	21.66
	9	21.82				9	16.16			9	18.25			9	21.65
	10	24.59				10	17.35			10	17.56			10	16.08
	11	24.22				11	16.09			11	15.98			11	16.06
	12	21.97				12	16.04			12	15.62			12	16.76
	13	22.88				13	16.22			13	14.51			13	17.55
	14	22.55				14	15.21			14	16.04			14	20.94
	15	21.98				15	16.23			15	16.62			15	19.27
	16	21.29				16	15.24
	Mean	22.81				Mean	16.81			Mean	16.52			Mean	19.21
	SEM	0.2528				SEM	0.3157			SEM	0.2421			SEM	0.4881
120	1	22.56			120	1	14.87			1	16.13			1	20.14
	2	22.58				2	17.87			2	15.28			2	20.37
	3	22.84				3	16.84			3	16.09			3	19.05
	4	23.08				4	17.25			4	15.28			4	18.11
	5	22.29				5	16.09			5	15.46			5	18.01
	6	24.54				6	17.24			6	16.44			6	19.03
	7	23.92				7	15.34			7	15.14			7	16.25
	8	22.37				8	16.09			8	17.22			8	20.66
	9	22.82				9	15.23			9	17.35			9	21.45
	10	24.59				10	15.04			10	16.48			10	16.08
	11	24.22				11	15.88			11	15.09			11	16.06
	12	21.97				12	16.02			12	15.18			12	16.56
	13	22.88				13	16.22			13	14.51			13	16.66
	14	22.55				14	15.21			14	15.87			14	20.94
	15	21.98				15	16.23			15	15.66			15	19.27
	16	21.29				16	15.24
	Mean	22.91				Mean	16.04			Mean	15.81			Mean	18.58
	SEM	0.2386				SEM	0.2221			SEM	0.2087			SEM	0.4929
124	1	22.56			124	1	14.87			1	15.66			1	19.23
	2	22.58				2	16.92			2	15.28			2	19.96
	3	22.84				3	16.24			3	15.67			3	18.78
	4	23.08				4	16.44			4	15.28			4	18.11
	5	22.59				5	15.98			5	15.46			5	18.01
	6	24.54				6	16.45			6	15.98			6	18.82
	7	23.92				7	15.34			7	15.14			7	15.28
	8	22.77				8	15.88			8	16.22			8	20.66
	9	22.82				9	14.89			9	17.12			9	20.11
	10	24.69				10	15.04			10	15.98			10	16.08
	11	24.22				11	15.15			11	15.09			11	16.06
	12	21.97				12	15.67			12	15.18			12	16.56
	13	22.98				13	15.89			13	14.51			13	16.66
	14	22.65				14	15.21			14	14.87			14	20.17
	15	21.98				15	15.66			15	14.34			15	18.74
	16	21.29				16	15.24
	Mean	22.97				Mean	15.68			Mean	15.45			Mean	18.22
	SEM	0.2358				SEM	0.1541			SEM	0.1805			SEM	0.4443
127	1	22.56			127	1	14.87			1	15.26		136	1	18.45
	2	22.58				2	16.04			2	15.28		138	2	18.34
	3	22.84				3	15.66			3	15.67		132	3	17.34
	4	23.08				4	16.03			4	15.28		130	4	17.66
	5	22.59				5	15.98			5	15.46		142	5	17.54
	6	24.54				6	15.87			6	15.02		138	6	18.08
	7	23.92				7	15.34			7	14.76		121	7	15.28
	8	22.77				8	15.88			8	16.78		134	8	20.22
	9	22.92				9	14.89			9	17.12		132	9	19.56
	10	24.69				10	15.04			10	15.98		128	10	15.23
	11	24.56				11	15.15			11	15.09		129	11	15.43
	12	22.09				12	15.12			12	15.18		127	12	15.43
	13	22.98				13	14.98			13	14.51		138	13	16.66
	14	22.98				14	15.21			14	14.87		137	14	16.87
	15	21.98				15	15.66			15	14.34		133	15	18.74
	16	21.29				16	15.24
	Mean	23.02				Mean	15.44			Mean	15.37			Mean	17.39
	SEM	0.2408				SEM	0.1073			SEM	0.1977			SEM	0.4068
130	1	22.96			130	1	14.87			1	15.26			1	17.45
	2	22.58				2	15.25			2	15.28			2	17.34
	3	22.94				3	15.66			3	15.67			3	16.23
	4	23.08				4	15.87			4	15.28			4	15.75
	5	22.59				5	15.98			5	15.46			5	17.51
	6	24.64				6	15.87			6	14.78			6	17.09
	7	23.92				7	15.34			7	14.76			7	15.28
	8	22.77				8	15.25			8	15.37			8	18.34
	9	22.92				9	14.89			9	16.44			9	17.11
	10	24.69				10	15.04			10	15.98			10	15.23
	11	24.56				11	15.15			11	15.09			11	15.43
	12	22.19				12	15.12			12	15.18			12	15.43
	13	22.98				13	14.98			13	14.51			13	16.16
	14	22.98				14	15.21			14	14.87			14	16.07
	15	22.45				15	15.66			15	14.34			15	17.74
	16	21.29				16	15.24
	Mean	23.1				Mean	15.34			Mean	15.22			Mean	16.54
	SEM	0.9301				SEM	0.09006			SEM	0.1411			SEM	0.2634
134	1	22.96			134	1	14.87						136	1	16.45
	2	22.98				2	15.25						138	2	16.34
	3	23.01				3	15.66						132	3	15.23
	4	23.08				4	15.12						130	4	14.75
	5	22.59				5	15.98						142	5	17.51
	6	24.64				6	15.87						138	6	17.09
	7	23.92				7	15.34						121	7	15.28
	8	22.77				8	14.56						134	8	18.34
	9	22.92				9	14.89						132	9	16.11
	10	24.69				10	15.04						128	10	15.23
	11	24.56				11	15.15						129	11	15.43
	12	22.29				12	15.12						127	12	15.43
	13	23.02				13	14.98						138	13	16.16
	14	22.18				14	15.21						137	14	15.29
	15	22.55				15	15.66						133	15	15.74
	16	21.59				16	15.24
	Mean	23.11				Mean	15.25							Mean	16.03
	SEM	0.2258				SEM	0.09517							SEM	0.2561
137	1	22.96			137	1	14.87						136	1	15.47
	2	22.98				2	15.25						138	2	16.34
	3	23.01				3	15.66						132	3	15.23
	4	23.08				4	15.12						130	4	14.75
	5	22.59				5	15.98						142	5	17.51
	6	24.64				6	15.07						138	6	17.09
	7	23.92				7	15.34						121	7	15.28
	8	22.77				8	14.26						134	8	17.34
	9	23.92				9	14.39						132	9	16.11
	10	24.69				10	15.04						128	10	15.23
	11	24.56				11	15.15						129	11	15.43
	12	22.29				12	15.12						127	12	15.43
	13	23.02				13	14.98						138	13	16.16
	14	23.18				14	15.21						137	14	15.29
	15	22.55				15	15.66						133	15	15.74
	16	21.59				16	15.24
	Mean	23.23				Mean	15.15							Mean	15.89
	SEM	0.2213				SEM	0.1073							SEM	0.2184
140	1	22.96											136	1	15.47
	2	23.98											138	2	16.34
	3	23.01											132	3	15.23
	4	23.08											130	4	14.75
	5	22.59											142	5	17.51
	6	24.64											138	6	17.09
	7	23.92											121	7	15.28
	8	22.97											134	8	16.34
	9	23.92											132	9	16.11
	10	24.69											128	10	15.23
	11	24.56											119	11	15.43
	12	22.29											127	12	15.43
	13	23.42											138	13	15.16
	14	23.58											137	14	15.29
	15	22.55											133	15	15.74
	16	21.59
	Mean	23.36												Mean	15.76
	SEM	0.2231												SEM	0.1991
143	1	22.96											136	1	15.47
	2	23.98											138	2	16.34
	3	24.01											132	3	15.23
	4	23.08											130	4	14.75
	5	22.59											146	5	16.51
	6	24.64											138	6	16.09
	7	24.92											121	7	15.28
	8	22.97											134	8	16.04
	9	23.92											132	9	16.11
	10	25.69											128	10	15.23
	11	24.56											119	11	15.43
	12	22.29											127	12	15.43
	13	23.42											138	13	15.16
	14	24.58											137	14	15.29
	15	22.55											133	15	15.74
	16	21.59
	Mean	23.61												Mean	15.61
	SEM	0.2775												SEM	0.13

## Sheet: Sheet2
Age in days	WT	SEM	N	untreat	SEM	N	control	SEM	N	Treat	SEM	N
80	21.53	0.2911	16	21.68	0.3005	15	21.86	0.3083	16	21.9	0.3898	15
84	21.69	0.3001	16	21.51	0.2895	15	21.8	0.2926	16	22.19	0.3788	15
87	21.85	0.3079	16	21.02	0.3052	15	21.5	0.3182	16	22.04	0.4007	15
90	21.99	0.2794	16	20.61	0.3212	15	21.11	0.3521	16	21.94	0.4049	15
94	22.03	0.2774	16	19.99	0.3155	15	20.51	0.3985	16	21.68	0.4486	15
97	22.11	0.2757	16	19.36	0.2815	15	19.81	0.3845	16	21.35	0.4679	15
100	22.17	0.2708	16	18.95	0.2948	15	19.25	0.3669	16	20.95	0.4857	15
104	22.4	0.2482	16	18.43	0.2832	15	18.69	0.3467	16	20.56	0.5268	15
107	22.43	0.2416	16	18.05	0.2802	15	18.14	0.3395	16	19.92	0.5292	15
110	22.51	0.2433	16	17.59	0.3149	15	17.55	0.3267	16	19.51	0.488	15
114	22.55	0.2533	16	16.99	0.2766	15	17.13	0.3123	16	19.35	0.4713	15
117	22.81	0.2528	16	16.52	0.2421	15	16.81	0.3157	16	19.21	0.4881	15
120	22.91	0.2386	16	15.81	0.2087	15	16.04	0.2221	16	18.58	0.4929	15
124	22.97	0.2358	16	15.45	0.1805	15	15.68	0.1541	16	18.22	0.4443	15
127	23.02	0.2408	16	15.37	0.1977	15	15.44	0.1073	16	17.39	0.4068	15
130	23.1	0.9301	16	15.22	0.1411	15	15.34	0.09006	16	16.54	0.2634	15
134	23.11	0.2258	16				15.25	0.09517	16	16.03	0.2561	15
137	23.23	0.2213	16				15.15	0.1073	16	15.89	0.2184	15
140	23.36	0.2231	16							15.76	0.1991	15
144	23.61	0.2775	16							15.61	0.13	15
